# Supplementary material for: Improvement of EGFR Testing over the Last Decade and Impact of Delaying TKI Initiation
Source: MDPI journal article supplement (doi:10.3390/curroncol28020102), 2021-02-26
Supplement: s1 [file s1]

Supplementary Figures

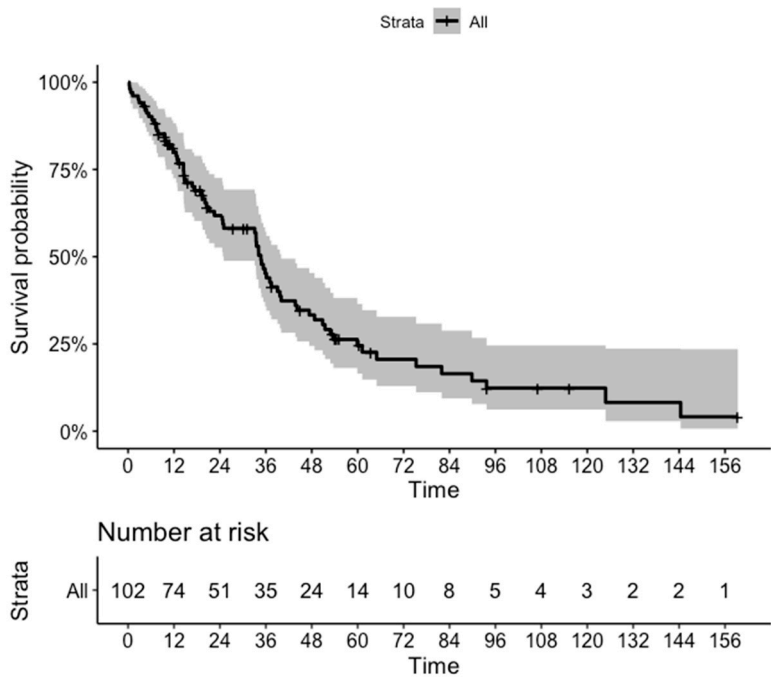

Supp Figure 1 : Overall survival from histological diagnosis in the whole population (N=102)

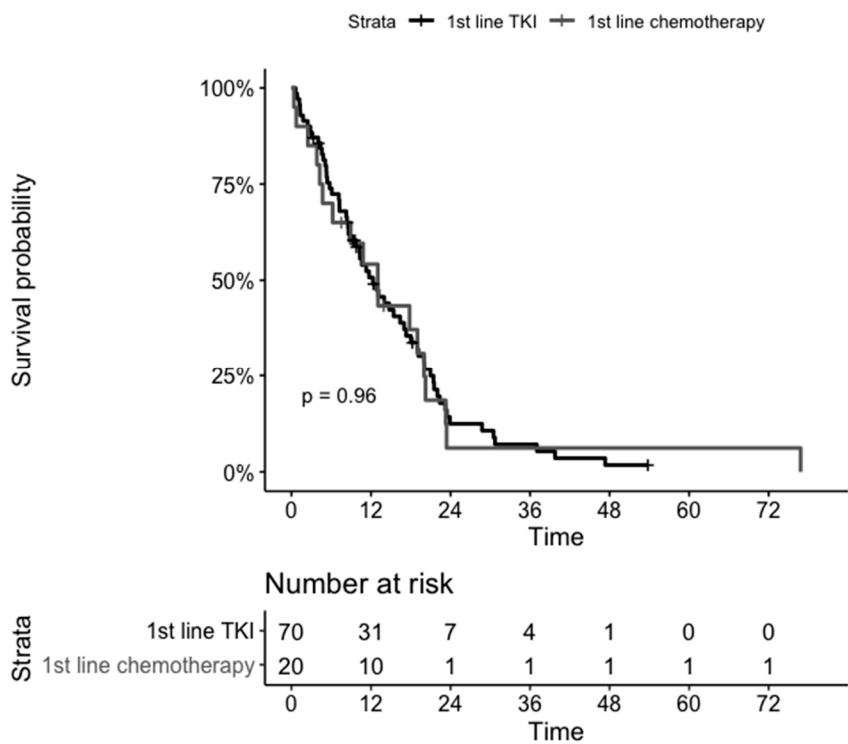

Supp Figure 2 : Progression-free survival (from the time of initiation of TKI therapy) in patients treated upfront with TKIs or in patients having received chemotherapy as a first line regimen.
